# Supplementary material for: Comparative Prediction of Gas Chromatographic Retention Indices for GC/MS Identification of Chemicals Related to Chemical Weapons Convention by Incremental and Machine Learning Methods
Source: MDPI journal article supplement (doi:10.3390/separations9100265), 2022-09-22
Supplement: s1 [file s1]

Supplementary materials to the manuscript

**“Comparative prediction of gas chromatographic retention indices for chemicals related to Chemical Weapons Convention by incremental and machine learning methods”**

by

*Albert Kireev<sup>1\*</sup>, Sergey Osipenko<sup>2</sup>, Gary Mallard<sup>3</sup>, Eugene Nikolaev<sup>4</sup> and Yury Kostyukevich<sup>1\*</sup>*

<sup>1</sup>Center for Molecular and Cellular Biology, Skolkovo Institute of Science and Technology, Bolshoy Boulevard 30, bld. 1, 121205 Moscow, Russia

<sup>2</sup>Center for Computational and Data-Intensive Science and Engineering, Skolkovo Institute of Science and Technology, Bolshoy Boulevard 30, bld. 1, 121205 Moscow, Russia

<sup>3</sup>Teal Consulting, Chevy Chase, Maryland, United States

<sup>4</sup>Laboratory of Mass-spectrometry, Skolkovo Institute of Science and Technology, Bolshoy Boulevard 30, bld. 1, 121205 Moscow, Russia

\*Corresponding authors Albert Kireev, Email: [A.Kireev@skoltech.ru](mailto:A.Kireev@skoltech.ru)

Yury Kostyukevich, Email: [Y.Kostyukevich@skoltech.ru](mailto:Y.Kostyukevich@skoltech.ru)

Table S1. Set of hyperparameters for grid search cross-validation

| Parameter     | Values                           |
|---------------|----------------------------------|
| Tree depth    | 2,4,6,8,10                       |
| Learning rate | 0.01, 0.05, 0.075, 0.1, 0.2, 0.3 |
| Gamma         | 0, 0.5, 1, 5, 10                 |

Table S2. Examples of calculated difference of retention index (RI) using molecular pairs matched by RO radical. 1A1, 1A2, 1A3 and selected 2B4 with 1A1 data sets are considered

| RO pairs           | 1A1 -2B4 |    |    | Thio 2B4 |    |   | 1A2     |    |    | 1A3     |    |    |
|--------------------|----------|----|----|----------|----|---|---------|----|----|---------|----|----|
|                    | RI diff  | SD | N  | RI diff  | SD | N | RI diff | SD | N  | RI diff | SD | N  |
| methyl : ethyl     | -70      | 9  | 11 | -69      | 3  | 3 | -57     | 4  | 10 | -45     | 5  | 37 |
| methyl : isopropyl | -101     | 8  | 11 | -102     | 6  | 5 | -75     | 11 | 10 | -52     | 8  | 39 |
| methyl : propyl    | -160     | 4  | 12 | -161     | 4  | 5 | -147    | 4  | 10 | -133    | 7  | 38 |

|                                          |      |    |    |      |    |    |      |    |    |      |    |    |
|------------------------------------------|------|----|----|------|----|----|------|----|----|------|----|----|
| methyl : sec-butyl                       | -200 | 10 | 12 | -205 | 3  | 4  | -172 | 9  | 10 | -145 | 9  | 39 |
| 1-Propylcyclohexyl<br>:1,2-Dimethylbutyl | 334  | 2  | 3  | NA   | NA | NA | NA   | NA | NA | NA   | NA | NA |

Table S3. Retention Indices predicted by R-P differences for 1A1 toxic chemicals with available combination of RO and RP, but missing RI data in OCAD library

| RO_P                   | Propyl_P | isoPropyl_P | Ethyl_P            | Methyl_P           |
|------------------------|----------|-------------|--------------------|--------------------|
| 1-Propylcyclohexyl     | 1600     | 1565        | PRESENT<br>IN OCAD | PRESENT<br>IN OCAD |
| 1-Propylheptyl         | 1637     | 1602        | PRESENT<br>IN OCAD | PRESENT<br>IN OCAD |
| 2,2-Dimethylcyclohexyl | 1494     | 1460        | 1409               | PRESENT<br>IN OCAD |
| 2,2-Dimethylhexyl      | 1436     | 1402        | 1351               | PRESENT<br>IN OCAD |
| 2,3-Dimethylpentyl     | 1390     | 1356        | 1305               | PRESENT<br>IN OCAD |
| 2,5-Dimethylcyclohexyl | 1500     | 1465        | PRESENT<br>IN OCAD | PRESENT<br>IN OCAD |
